# Supplementary material for: Hydrothermal control of the lithium-rich Li2MnO3 phase in lithium manganese oxide nanocomposites and their application as precursors for lithium adsorbents
Source: Royal Society of Chemistry journal article supplement (doi:10.1039/d1dt01638e), 2021-01-01
Supplement: d1dt01638e1.pdf [file d1dt01638e1.pdf]

## Supporting Information

### **Hydrothermal Control of the lithium-rich $\text{Li}_2\text{MnO}_3$ phase in lithium manganese oxide nanocomposites and their application as precursors for lithium adsorbents**

Ruth Pulido<sup>a,b\*</sup>, Nelson Naveas<sup>a,b</sup>, Teófilo Graber<sup>b</sup>, Raúl J. Martín-Palma<sup>a</sup>, Fernando Agulló-Rueda<sup>c</sup>, Iván Brito<sup>d</sup>, Carlos Morales<sup>a</sup>, Leonardo Soriano<sup>a</sup>, Laura Pascual<sup>e</sup>, Carlo Marini<sup>f</sup>, Jacobo Hernández-Montelongo<sup>g</sup>, Miguel Manso Silván<sup>ah</sup>

<sup>a</sup>Departamento de Física Aplicada and Instituto Universitario de Ciencia de Materiales Nicolás Cabrera, Universidad Autónoma de Madrid, 28049 Madrid, Spain.

<sup>b</sup>Departamento de Ingeniería Química y Procesos de Minerales, Universidad de Antofagasta, Avenida Angamos 601, Antofagasta, Chile.

<sup>c</sup>Instituto de Ciencia de Materiales de Madrid (ICMM), CSIC, 28049 Madrid, Spain.

<sup>d</sup>Departamento de Química, Universidad de Antofagasta, Avda. Universidad de Antofagasta 02800, 1240000, Antofagasta, Chile.

<sup>e</sup>Instituto de Catálisis y Petroleoquímica, CSIC, 28049 Madrid, Spain.

<sup>f</sup>CELLS–ALBA Synchrotron, 08290 Cerdanyola del Valles, Spain.

<sup>g</sup>Departamento de Ciencias Matemáticas y Físicas, UC Temuco, 4813302 Temuco, Chile.

<sup>h</sup>Centro de Microanálisis de Materiales, Universidad Autónoma de Madrid, Campus de Cantoblanco, 28049 Madrid, Spain.

\*To whom correspondence should be addressed:

e-mail address: ruth.pulido@estudiante.uam.es

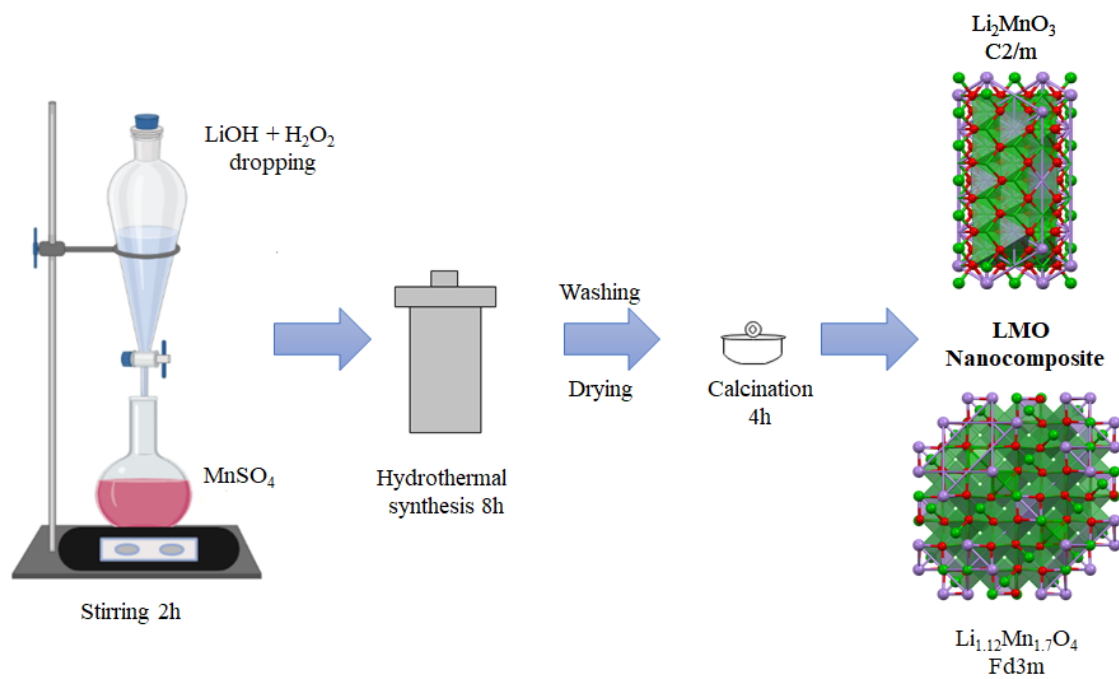

**Figure S1** Schematic representation of the hydrothermal synthesis of Li<sub>2</sub>MnO<sub>3</sub> · Li<sub>1.12</sub>Mn<sub>1.7</sub>O<sub>4</sub> nanocomposites.

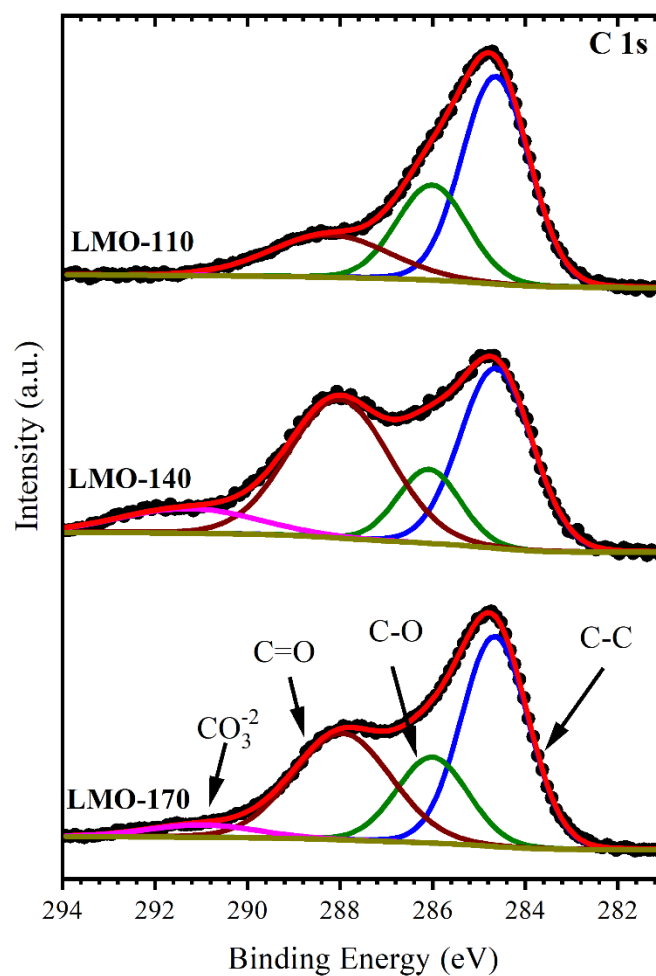

**Figure S2** High-resolution XPS spectra of C 1s from the LMO nanocomposites. The peak fitting analysis of C 1s core-level showed the typical C-C (284.60 eV) and C-O (286 eV) components. Moreover, around 288 and 291 eV, other two contributions can be assigned to C=O and CO<sub>3</sub><sup>-2</sup>-like, related to the adsorbed atmospheric carbon and further formation of Li<sub>2</sub>CO<sub>3</sub>, respectively<sup>1-4</sup>

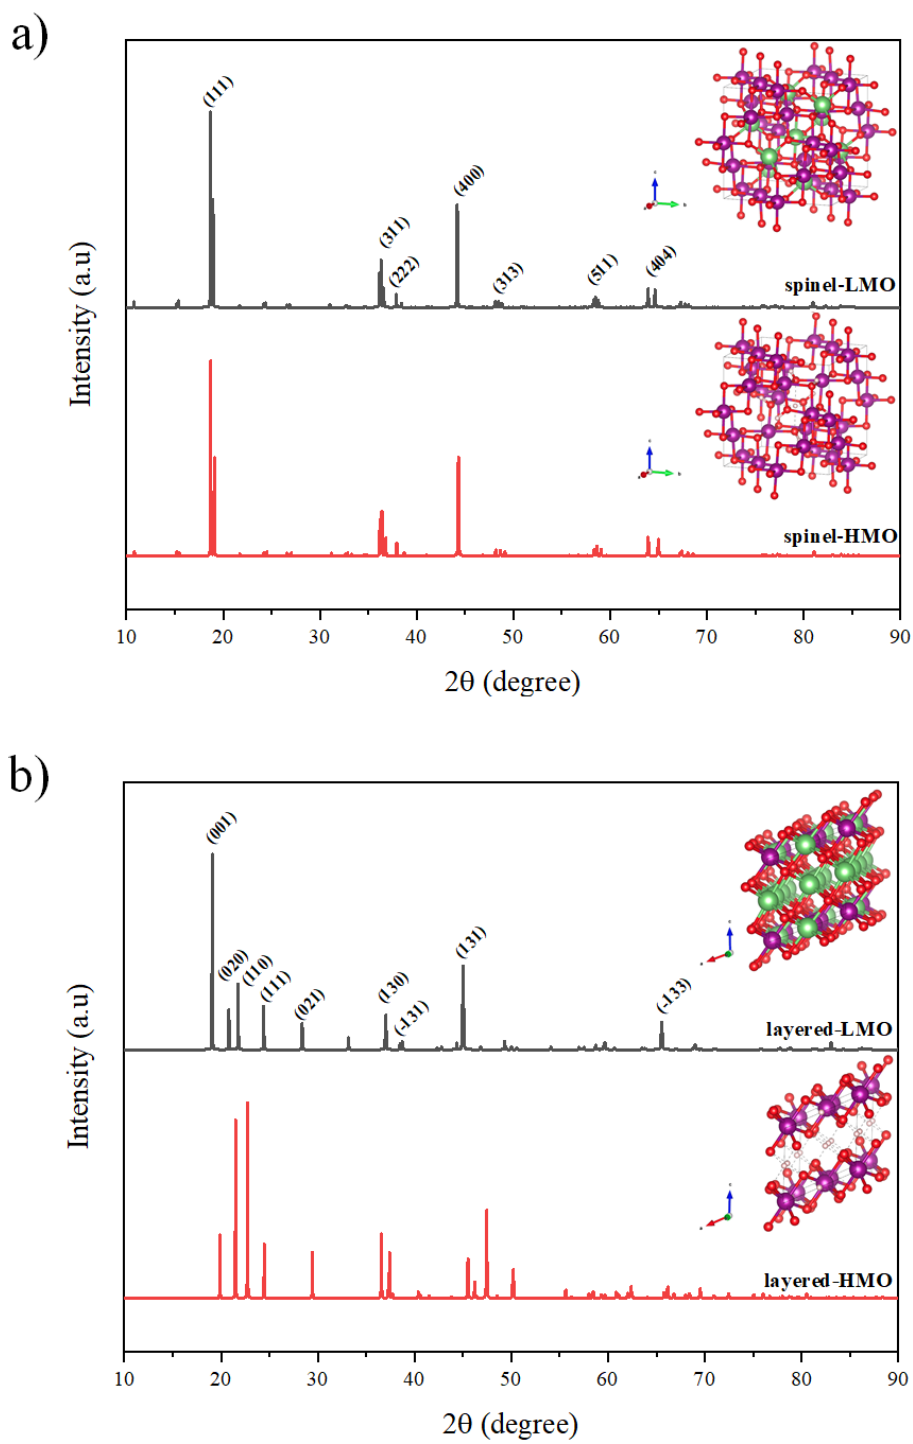

**Figure S3** Simulated XRD patterns of adsorbent precursor materials in pure phase.

Layered-LMO (a) and spinel-LMO (b).

**Table S1**

Structural parameters of LMO nanocomposites determined by Rietveld refinement of XRD data.

| Nanocomposite | Phase                                               | a (Å)  | b (Å)  | c (Å)  | $\beta$ angle(°) | V (Å <sup>3</sup> ) |
|---------------|-----------------------------------------------------|--------|--------|--------|------------------|---------------------|
| LMO-110       | Li <sub>1.12</sub> Mn <sub>1.7</sub> O <sub>4</sub> | 8.1397 | -      | -      | -                | 539.2955            |
|               | Li <sub>2</sub> MnO <sub>3</sub>                    | 4.9400 | 8.5277 | 5.0085 | 108.800          | 199.7378            |
| LMO-140       | Li <sub>1.12</sub> Mn <sub>1.7</sub> O <sub>4</sub> | 8.1272 | -      | -      | -                | 536.8187            |
|               | Li <sub>2</sub> MnO <sub>3</sub>                    | 4.9279 | 8.5260 | 5.0108 | 108.930          | 199.1424            |
| LMO-170       | Li <sub>1.12</sub> Mn <sub>1.7</sub> O <sub>4</sub> | 8.1366 | -      | -      | -                | 538.6697            |
|               | Li <sub>2</sub> MnO <sub>3</sub>                    | 4.9303 | 8.5306 | 5.0130 | 108.943          | 199.4214            |

**Table S2**

Quantitative analysis C 1s XPS spectra of LMO nanocomposite

| Sample  | C-C% | C-O% | C=O% | CO <sub>3</sub> <sup>2-</sup> % |
|---------|------|------|------|---------------------------------|
| LMO-170 | 12.1 | 5.3  | 9.0  | 1.1                             |
| LMO-140 | 5.3  | 1.9  | 5.8  | 1.3                             |
| LMO-110 | 9.5  | 4.6  | 3.4  | 0.0                             |

**Table S3**

DFT optimized cell parameters for simulated LMO and HMO

| Structure                                        | Cell parameters |         |         |                   |            |
|--------------------------------------------------|-----------------|---------|---------|-------------------|------------|
|                                                  | a(Å)            | b(Å)    | c(Å)    | $\beta$ angle (°) | Volume     |
| Li <sub>9</sub> Mn <sub>15</sub> O <sub>32</sub> | 8.19191         | -       | -       | -                 | 549.655156 |
| H <sub>9</sub> Mn <sub>15</sub> O <sub>32</sub>  | 8.16750         | -       | -       | -                 | 544.333233 |
| Li <sub>8</sub> Mn <sub>4</sub> O <sub>12</sub>  | 4.93214         | 8.53083 | 4.93276 | 109.5915          | 195.531518 |
| H <sub>8</sub> Mn <sub>4</sub> O <sub>12</sub>   | 4.82884         | 8.92474 | 4.58778 | 115.7690          | 178.053829 |

**Table S4**

Simulated X-ray diffraction data for LMO and HMO

| <i>hkl</i> | Li <sub>9</sub> Mn <sub>15</sub> O <sub>32</sub> |            | H <sub>9</sub> Mn <sub>15</sub> O <sub>32</sub> |            | Li <sub>8</sub> Mn <sub>4</sub> O <sub>12</sub> |            | H <sub>8</sub> Mn <sub>4</sub> O <sub>12</sub> |            |
|------------|--------------------------------------------------|------------|-------------------------------------------------|------------|-------------------------------------------------|------------|------------------------------------------------|------------|
|            | <i>d</i> (Å)                                     | 2 $\theta$ | <i>d</i> (Å)                                    | 2 $\theta$ | <i>d</i> (Å)                                    | 2 $\theta$ | <i>d</i> (Å)                                   | 2 $\theta$ |
| 111        | 4.6822                                           | 18.93      | 4.5978                                          | 19.28      | -                                               | -          | -                                              | -          |
| 400        | 2.0477                                           | 44.19      | 2.0406                                          | 44.35      | -                                               | -          | -                                              | -          |
| 001        | -                                                | -          | -                                               | -          | 4.6471                                          | 19.08      | 4.1315                                         | 21.49      |
| 131        | -                                                | -          | -                                               | -          | 2.0107                                          | 45.05      | 1.9144                                         | 47.45      |

**References**

- 1 S.-H. Lee, I.-S. Jo and J. Kim, *Surf. Interface Anal.*, 2014, **46**, 570–576.
- 2 P. Verma, P. Maire and P. Novák, *Electrochim. Acta*, 2010, **55**, 6332–6341.
- 3 D. Aurbach, I. Weissman, A. Schechter and H. Cohen, *Langmuir*, 1996, **12**, 3991–4007.
- 4 L. El Ouatani, R. Dedryvère, J.-B. Ledeuil, C. Siret, P. Biensan, J. Desbrières and D. Gonbeau, *J. Power Sources*, 2009, **189**, 72–80.
